# Supplementary material
Source: MDPI journal article supplement (https://www.mdpi.com/2071-1050/14/14/8435)
Supplement: s1 [file s1]

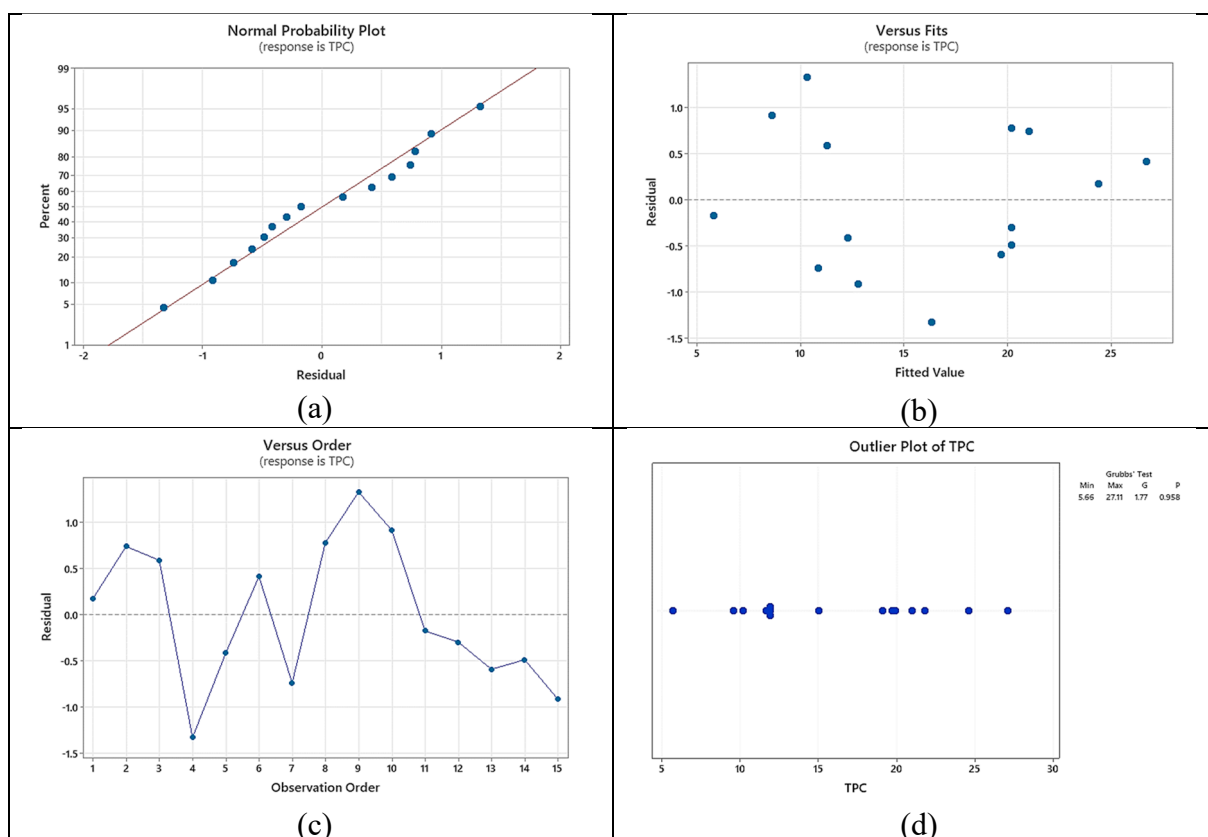

**Figure S1.** Model adequacy diagnostic plots for total phenolic contents (TPC): normal probability plot of residuals (a), a plot of residuals against fitted values (b), plot of residuals against observation order (c), and plot of outlier against TPC values (d).

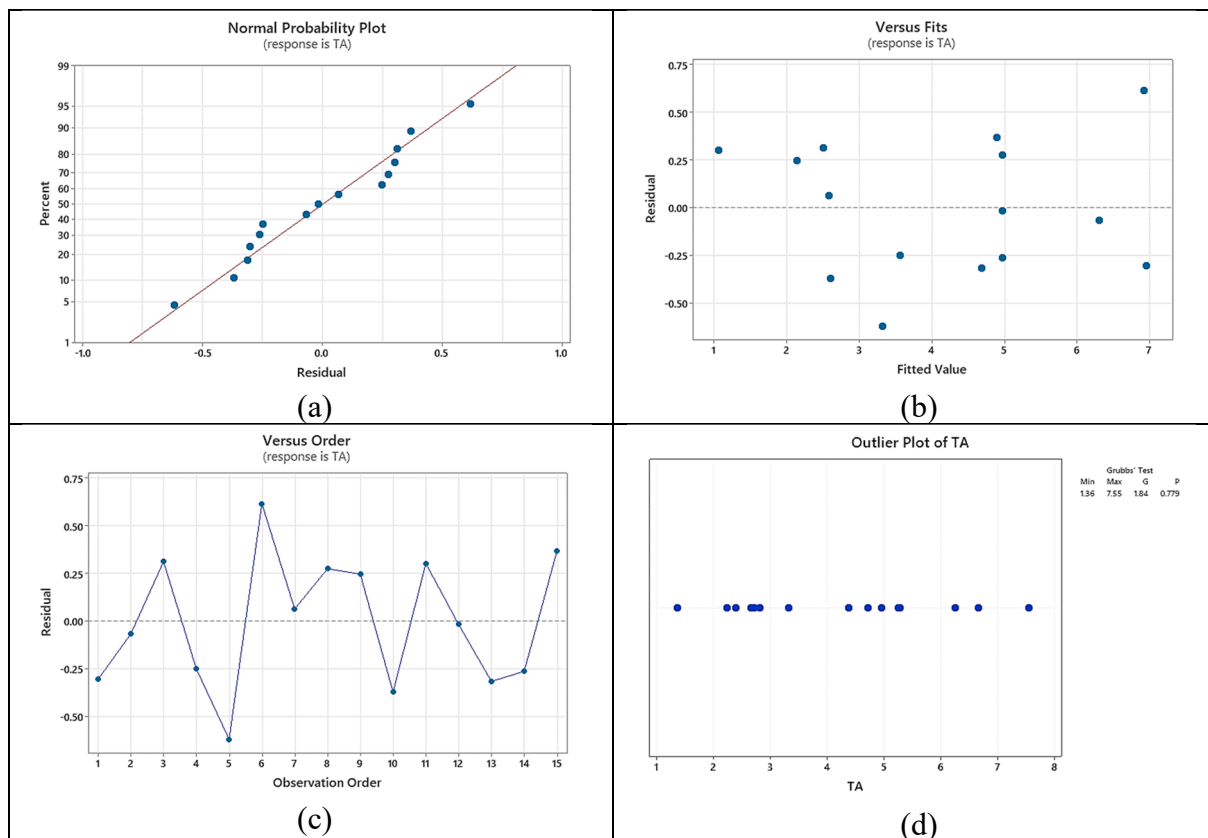

**Figure S2.** Model adequacy diagnostic plots for total antioxidant (AA): normal probability plot of residuals (a), a plot of residuals against fitted values (b), plot of residuals against run order (c), and plot of outlier against AA values (d).

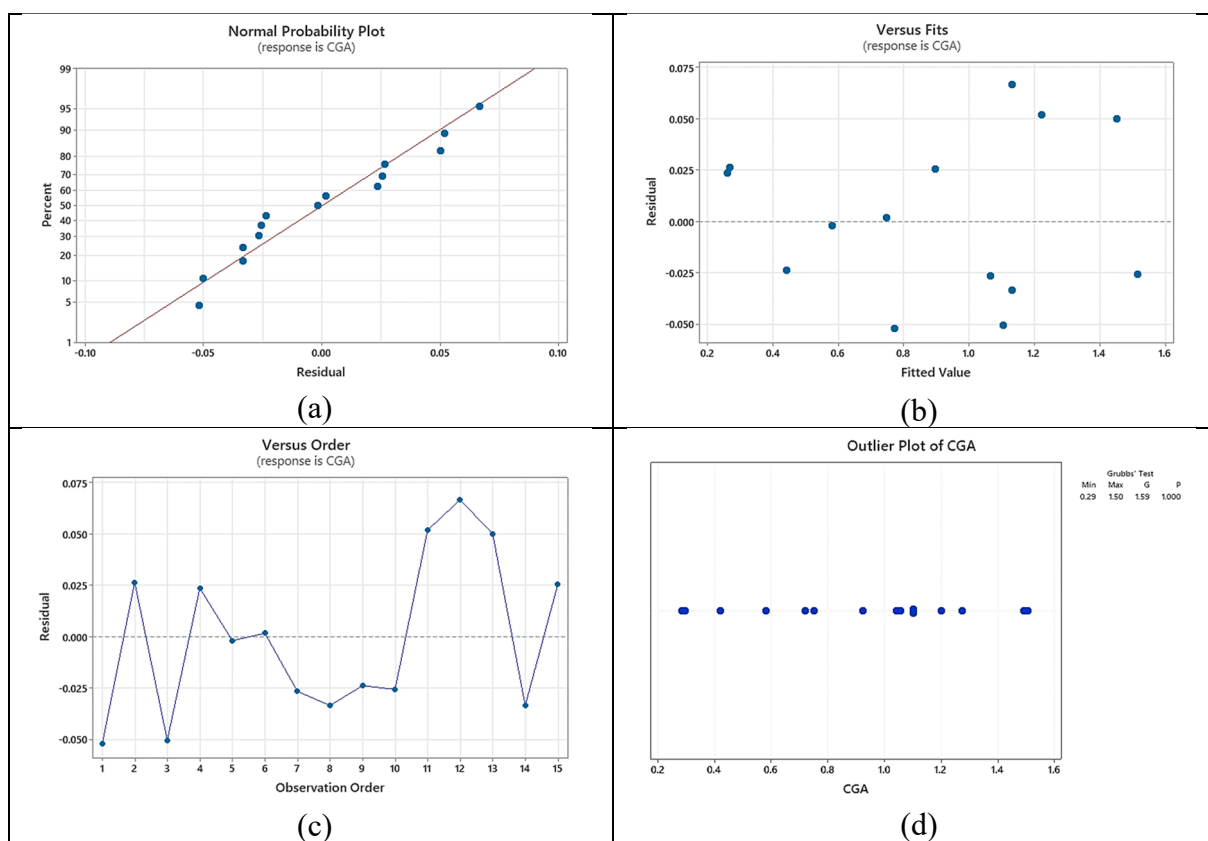

**Figure S3.** Model adequacy diagnostic plots for total chlorogenic acids (T-CQA): normal probability plot of residuals (a), a plot of residuals against fitted values (b), plot of residuals against run order (c), and plot of outlier against T-CQA values (d).

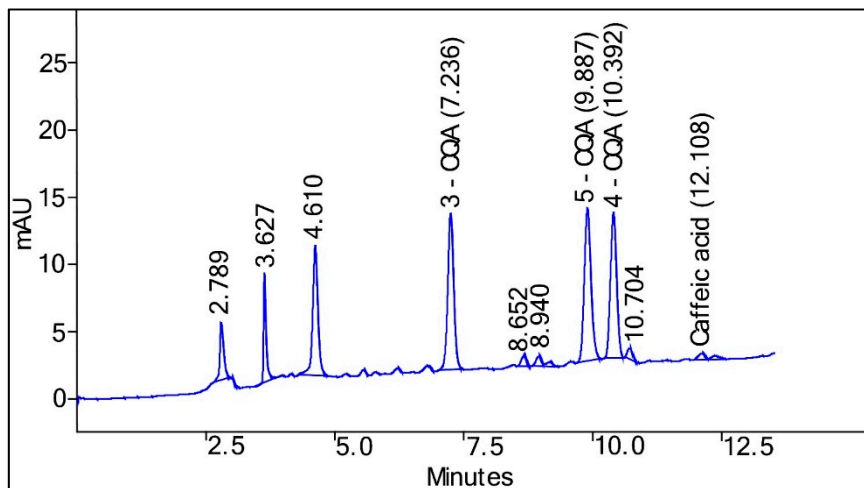

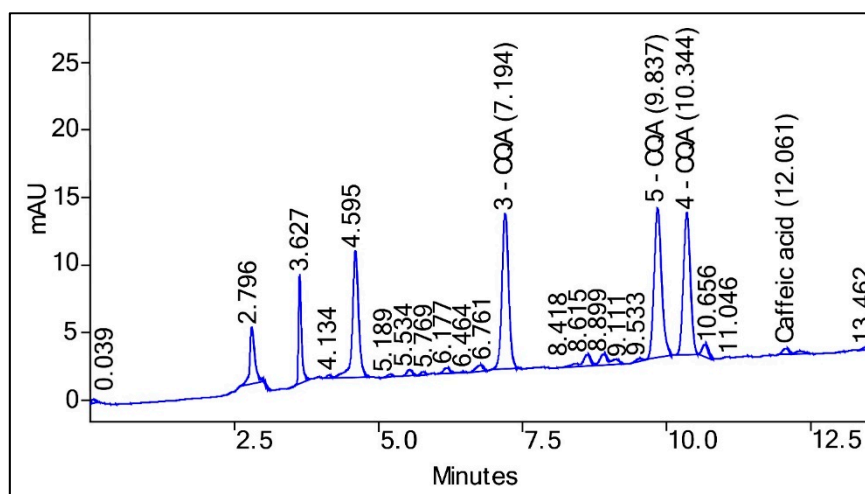

**Figure S4.** An example of chromatograms of 3, 4, and 5-CQA in the CS extract obtained from the optimum condition [147.9°C, 10 min, and 1:10 (s/L ratio)]
